# Supplementary material for: A novel thermally activated delayed fluorescence macrocycle
Source: Royal Society of Chemistry journal article supplement (doi:10.1039/d2cc04618k), 2022-01-01
Supplement: d2cc04618k1.pdf [file d2cc04618k1.pdf]

## Electronic Supplementary Information

### A novel thermally activated delayed fluorescence macrocycle

He-Ye Zhou,<sup>a,b</sup> Da-Wei Zhang,<sup>a,b</sup> Xiao-Ni Han,<sup>a</sup> Ying Han<sup>\*,a</sup> and Chuan-Feng Chen<sup>\*,a,b</sup>

<sup>a</sup>*Beijing National Laboratory for Molecular Sciences, CAS Key Laboratory of Molecular Recognition and Function, Institute of Chemistry, Chinese Academy of Sciences, Beijing 100190, China.*

<sup>b</sup>*University of Chinese Academy of Sciences, Beijing 100049, China.*

E-mail: cchen@iccas.ac.cn; hanying463@iccas.ac.cn

### Table of Contents

|                                                     |     |
|-----------------------------------------------------|-----|
| 1. Materials and methods .....                      | S2  |
| 2. Synthetic procedures and characterized data..... | S2  |
| 3. Crystal structures and crystal data.....         | S7  |
| 4. Theoretical calculations.....                    | S9  |
| 5. Photophysical measurements.....                  | S20 |
| 6. References.....                                  | S20 |

## 1. Materials and methods

All the reagents were commercially available and used without further purification. The compound **1** was prepared according to the literature method.<sup>[S1]</sup> Anhydrous dichloromethane was dried from 4Å molecular sieves. Flash column chromatography was performed on 200-300 mesh silica gel. NMR spectroscopy experiments were recorded on the Bruker Avance III 500 MHz NMR spectrometer. High resolution mass spectra were measured on a Thermo Fisher Exactive high resolution LC-MS spectrometer. Single-crystal X-ray diffraction data were collected on a Bruker Smart APEXII CCD diffractometer using graphite monochromated Cu K $\alpha$  radiation at 170 K. UV-vis spectra were recorded on PerkinElmer Lambda 950 UV-Vis/NIR spectrometer, and photoluminescence (PL) spectra and transient PL decay characteristics were measured on an Edinburgh Instruments FLS 1000 spectrometer. Photoluminescent quantum yield (PLQY) were measured on a HORIBA FluoroMax spectrometer utilizing an integrating sphere.

## 2. Synthetic procedures and characterized data

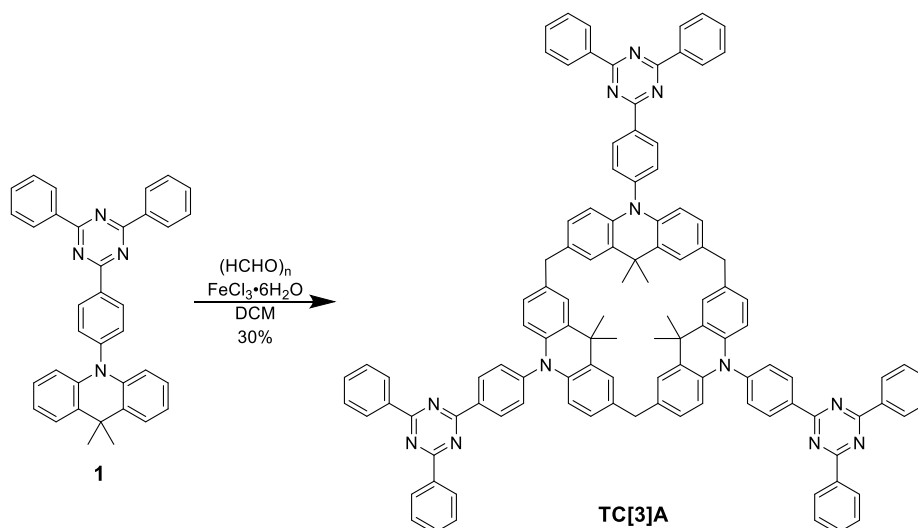

To a solution of **1** (3.00 g, 5.81 mmol) and paraformaldehyde (523 mg, 17.4 mmol) in anhydrous dichloromethane (580 mL) was added  $\text{FeCl}_3 \cdot 6\text{H}_2\text{O}$  (2.36 g, 8.73 mmol). After continuing stirring at room temperature for 6 h, the reaction was quenched by addition of 300 mL water. Then the organic phase was separated and dried with

anhydrous  $\text{MgSO}_4$ . The solvent was evaporated under vacuum to give a residue, which was purified by column chromatograph ( $\text{CH}_2\text{Cl}_2$ /petroleum ether, 2:3 v/v) to yield **TC[3]A** (920 mg, 30%) as yellow solid.  $^1\text{H}$  NMR (500 MHz,  $\text{CDCl}_3$ ):  $\delta = 9.01$  (d,  $J = 8.1$  Hz, 6H), 8.85–8.80 (m, 12H), 7.65–7.58 (m, 24H), 7.19 (d,  $J = 2.1$  Hz, 6H), 6.94 (dd,  $J = 8.4, 1.9$  Hz, 6H), 6.42 (d,  $J = 8.2$  Hz, 6H), 3.91 (s, 5H), 1.51 (s, 18H).  $^{13}\text{C}$  NMR (125 MHz,  $\text{CDCl}_3$ ):  $\delta = 171.8, 171.2, 145.6, 139.7, 136.1, 135.7, 134.3, 132.7, 131.3, 131.3, 131.1, 129.0, 128.7, 126.7, 124.5, 114.2, 40.8, 36.3, 29.2$ . HRMS (APCI):  $m/z$   $[\text{M} + \text{H}]^+ = 1585.7026$  (calcd. 1585.7015 for  $\text{C}_{111}\text{H}_{85}\text{N}_{12}^+$ ). Anal. calcd. (%) for  $\text{C}_{111}\text{H}_{84}\text{N}_{12}$ : C 84.06, H 5.34, N 10.60; found: C 83.65, H 5.59, N 9.96.

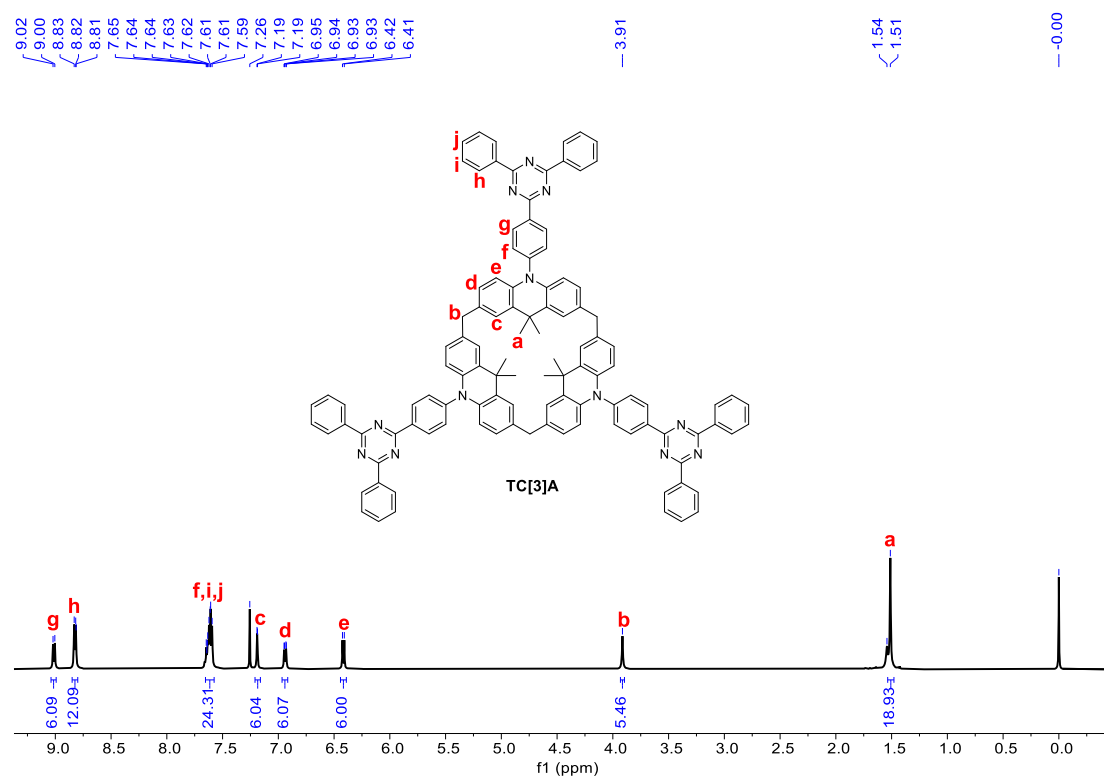

**Fig. S1**  $^1\text{H}$  NMR spectrum (500 MHz,  $\text{CDCl}_3$ , 298 K) of **TC[3]A**.

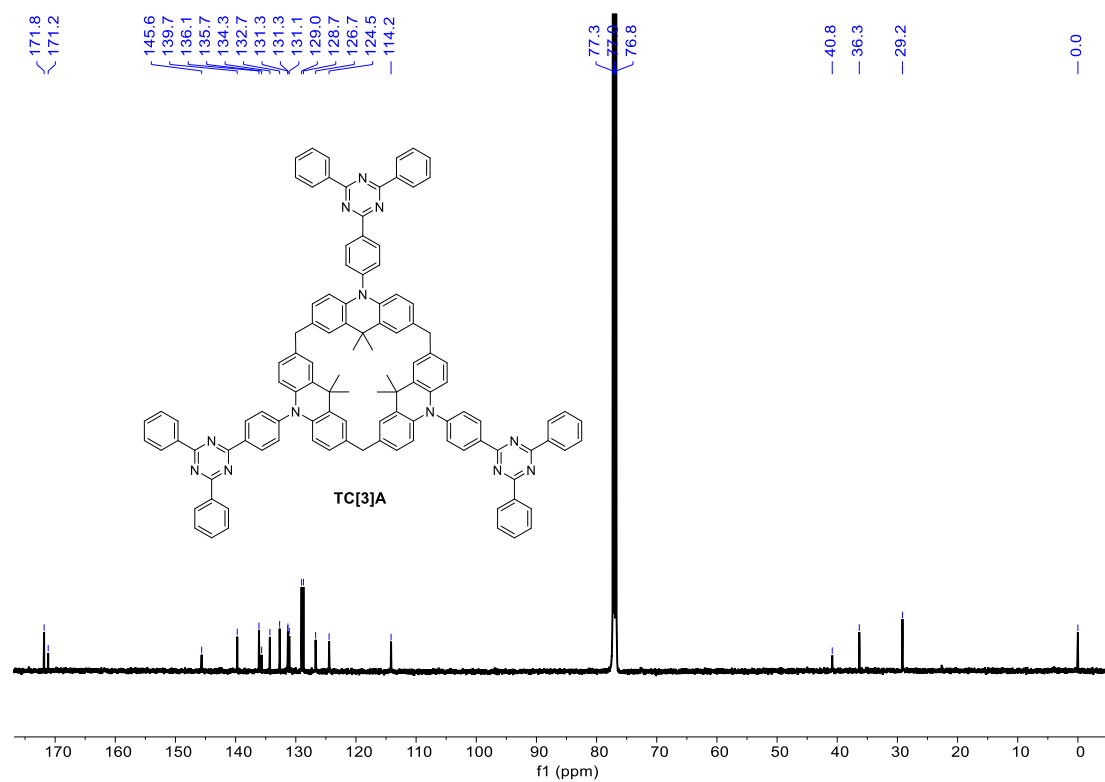

**Fig. S2**  $^{13}\text{C}$  NMR spectrum (125 MHz,  $\text{CDCl}_3$ , 298 K) of compound TC[3]A.

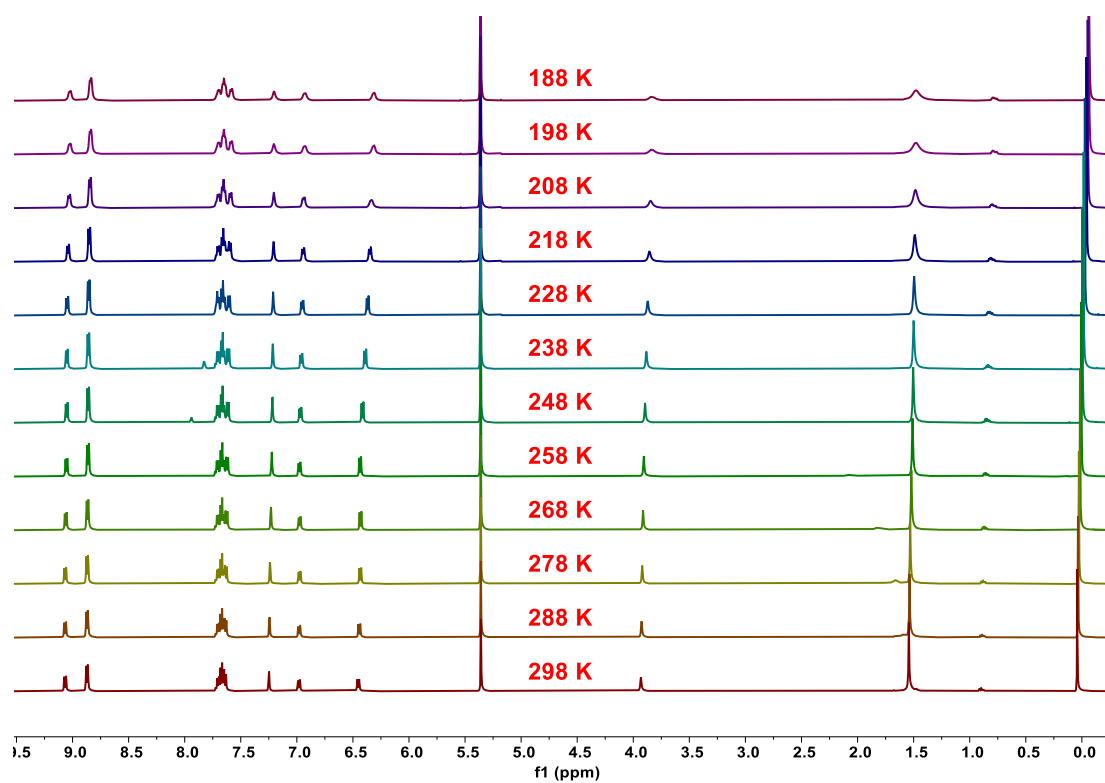

**Fig. S3** Variable-temperature  $^1\text{H}$  NMR (500 MHz) spectra of TC[3]A in  $\text{CD}_2\text{Cl}_2$ .

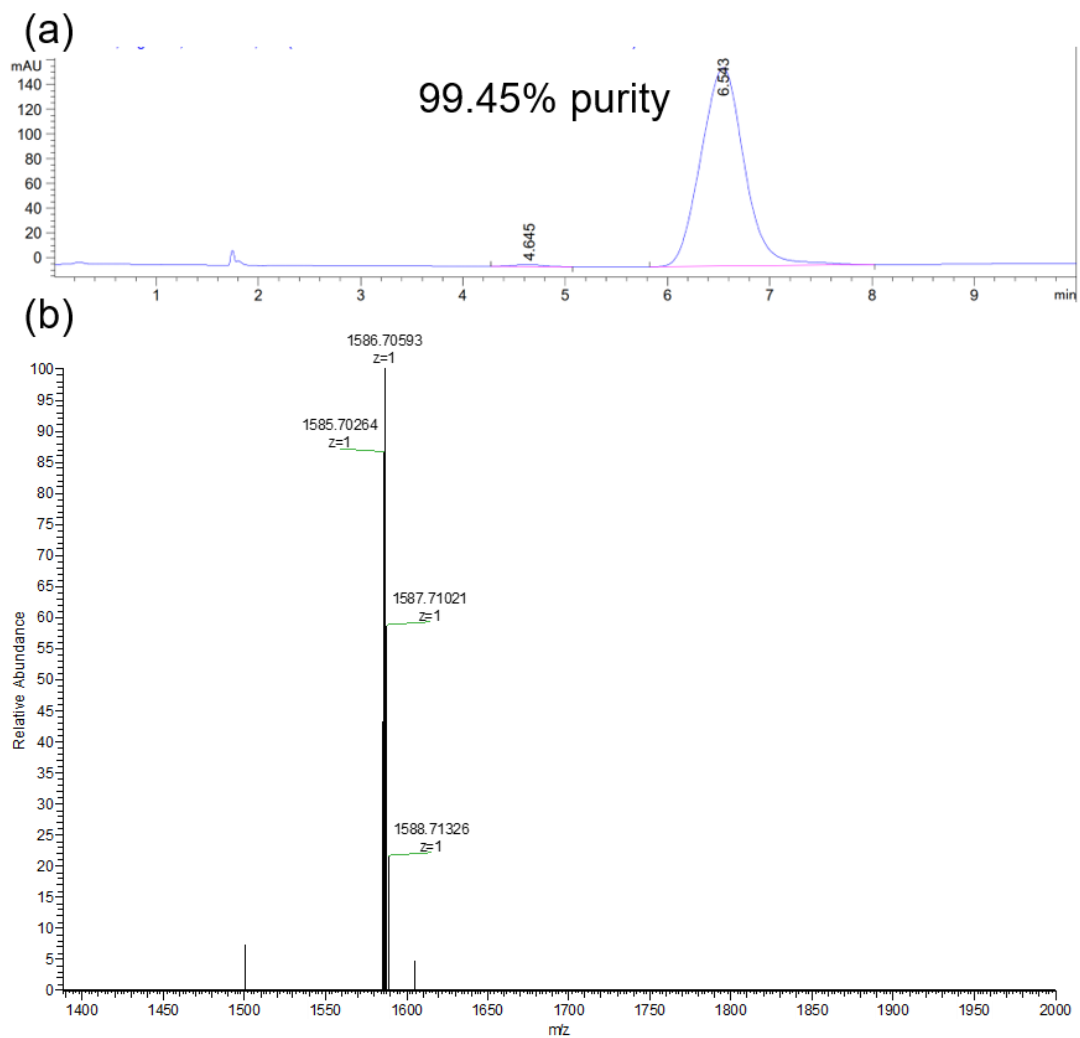

**Fig. S4** HPLC analysis and HR-MS (APCI) spectrum of TC[3]A.

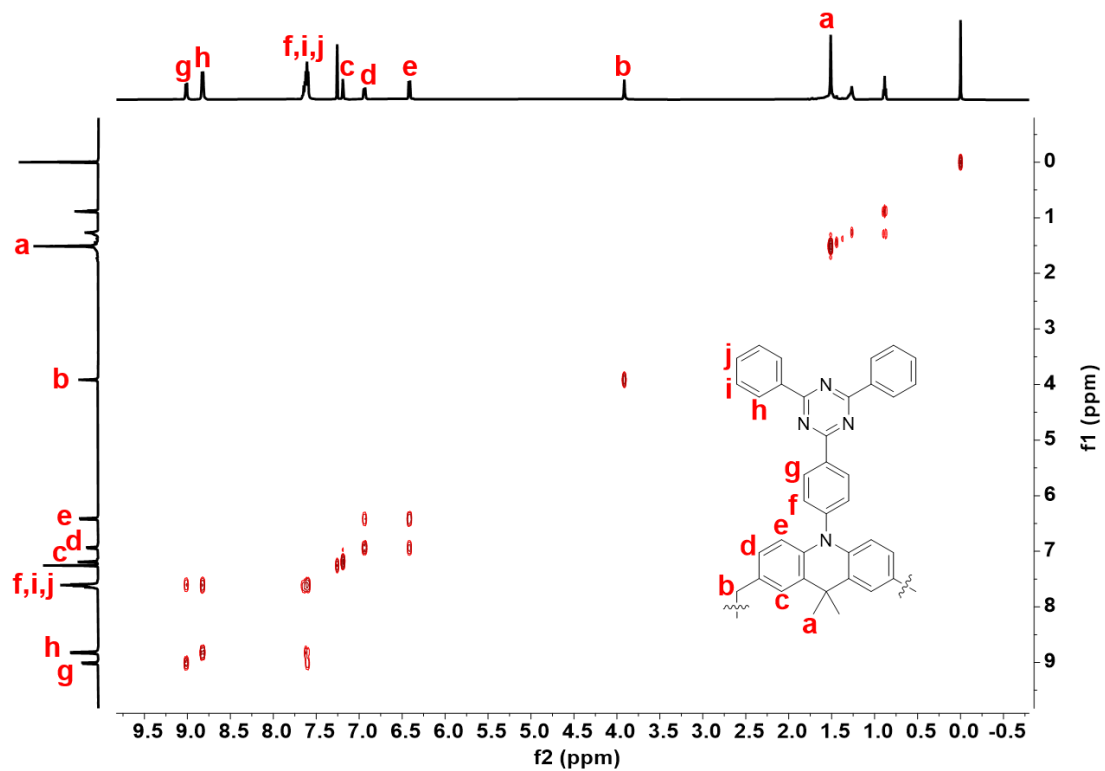

Fig. S5 2D COSY spectrum (500 MHz, CDCl<sub>3</sub>, 298 K) of TC[3]A.

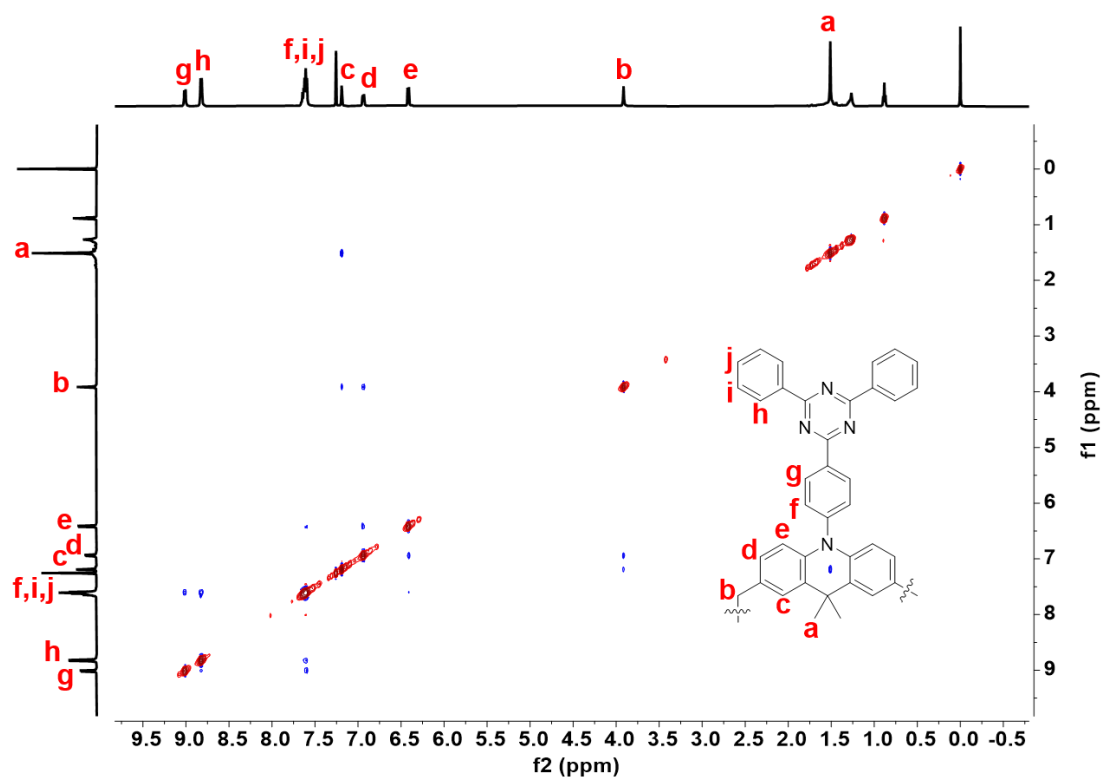

Fig. S6 2D NOESY spectrum (500 MHz, CDCl<sub>3</sub>, 298 K) of TC[3]A.

### 3. Crystal structures and crystal data

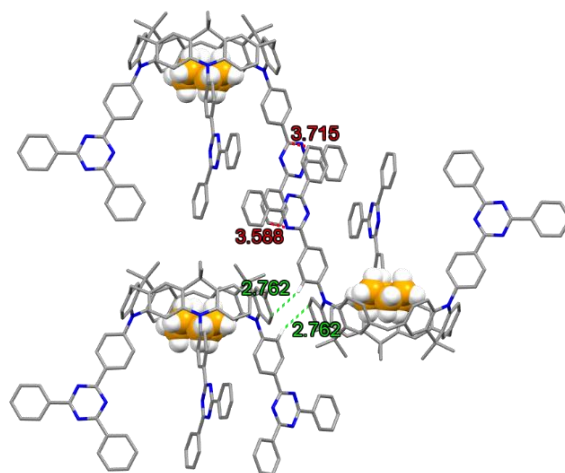

**Fig. S7** Illustration of  $\pi$ - $\pi$  stacking (red lines) and C-H $\cdots$  $\pi$  (green lines) interactions in the packing mode of TC[3]A- $\alpha$  with the cone conformation.

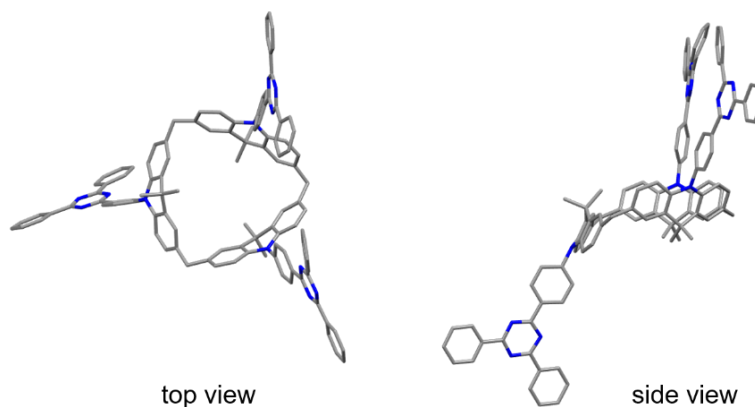

**Fig. S8** Crystal structure of TC[3]A- $\beta$  with the partial-cone conformation.

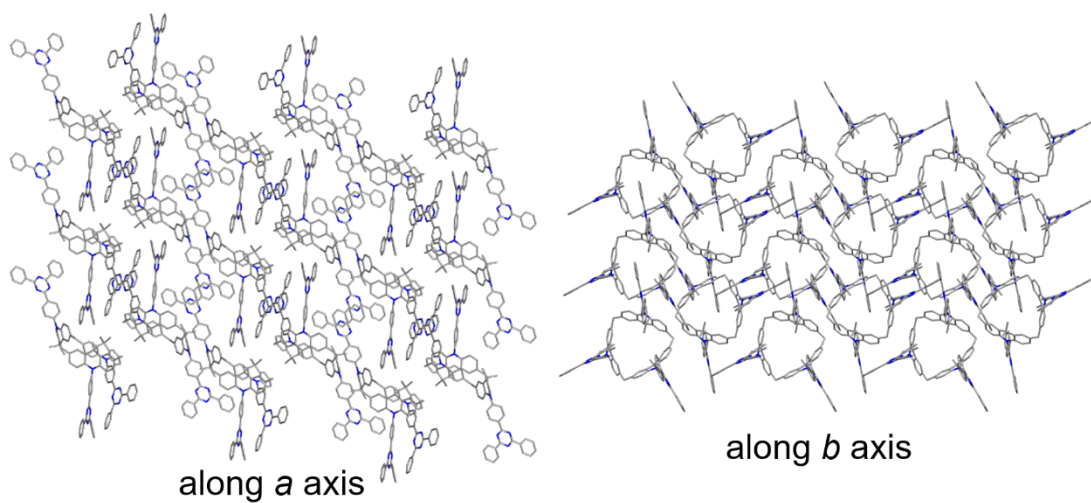

**Fig. S9** Packing mode of TC[3]A- $\beta$  with the partial-cone conformation.

**Table S1** Crystal data and structure refinement parameters for **TC[3]A**.

| Crystals                                    | <b>TC[3]A-<math>\alpha</math></b>                              | <b>TC[3]A-<math>\beta</math></b>                               |
|---------------------------------------------|----------------------------------------------------------------|----------------------------------------------------------------|
| CCDC No.                                    | 2192661                                                        | 2192662                                                        |
| Empirical formula                           | C <sub>37</sub> H <sub>28</sub> N <sub>4</sub>                 | C <sub>111</sub> H <sub>84</sub> N <sub>12</sub>               |
| Formula weight                              | 528.63                                                         | 1585.9                                                         |
| Temperature/K                               | 169.99(13)                                                     | 170.00(13)                                                     |
| Crystal system                              | trigonal                                                       | triclinic                                                      |
| Space group                                 | P-3                                                            | P-1                                                            |
| a/Å                                         | 24.5261(4)                                                     | 13.0996(2)                                                     |
| b/Å                                         | 24.5261(4)                                                     | 18.3840(3)                                                     |
| c/Å                                         | 17.8430(2)                                                     | 23.2467(3)                                                     |
| $\alpha$ /°                                 | 90                                                             | 97.7680(10)                                                    |
| $\beta$ /°                                  | 90                                                             | 90.2160(10)                                                    |
| $\gamma$ /°                                 | 120                                                            | 109.9910(10)                                                   |
| Volume/Å <sup>3</sup>                       | 9295.1(3)                                                      | 5205.23(14)                                                    |
| Z                                           | 6                                                              | 2                                                              |
| $\rho_{\text{calc}}/\text{cm}^3$            | 0.567                                                          | 1.012                                                          |
| $\mu/\text{mm}^{-1}$                        | 0.261                                                          | 0.465                                                          |
| F(000)                                      | 1668                                                           | 1668                                                           |
| Crystal size/mm <sup>3</sup>                | 0.520 × 0.200 × 0.005                                          | 0.300 × 0.200 × 0.100                                          |
| Radiation                                   | CuK $\alpha$ ( $\lambda$ = 1.54184)                            | CuK $\alpha$ ( $\lambda$ = 1.54184)                            |
| 2 $\theta$ range for data collection/°      | 4.952 to 150.228                                               | 3.842 to 154.746                                               |
| Index ranges                                | -23 ≤ h ≤ 25, -29 ≤ k ≤ 30, -21 < l < 16                       | -16 ≤ h ≤ 15, -23 ≤ k ≤ 22, -28 ≤ l < 29                       |
| Reflections collected                       | 37936                                                          | 68701                                                          |
| Independent reflections                     | 12246 [R <sub>int</sub> = 0.0341, R <sub>sigma</sub> = 0.0354] | 21096 [R <sub>int</sub> = 0.0475, R <sub>sigma</sub> = 0.0392] |
| Data/restraints/parameters                  | 12246/0/390                                                    | 21096/0/1115                                                   |
| Goodness-of-fit on F <sup>2</sup>           | 1.342                                                          | 1.092                                                          |
| Final R indexes [I >= 2 $\sigma$ (I)]       | R <sub>1</sub> = 0.0971, wR <sub>2</sub> = 0.3003              | R <sub>1</sub> = 0.0726, wR <sub>2</sub> = 0.1647              |
| Final R indexes [all data]                  | R <sub>1</sub> = 0.1075, wR <sub>2</sub> = 0.3156              | R <sub>1</sub> = 0.0842, wR <sub>2</sub> = 0.1709              |
| Largest diff. peak/hole / e Å <sup>-3</sup> | 1.16/-0.40                                                     | 0.38/-0.22                                                     |
| Crystallization solvents                    | cyclohexane/dichloromethane                                    | isopropyl ether/dichloromethane                                |



#### 4. Theoretical calculations

The conformers of TC[3]A (cone and partial-cone conformers) were optimized at the DFT level using the B3LYP exchange-correlation functional and the 6-31G(d) basis set. The calculations were performed using Gaussian 16 software package. The HOMO and LUMO were visualized with Gaussview 6.0.

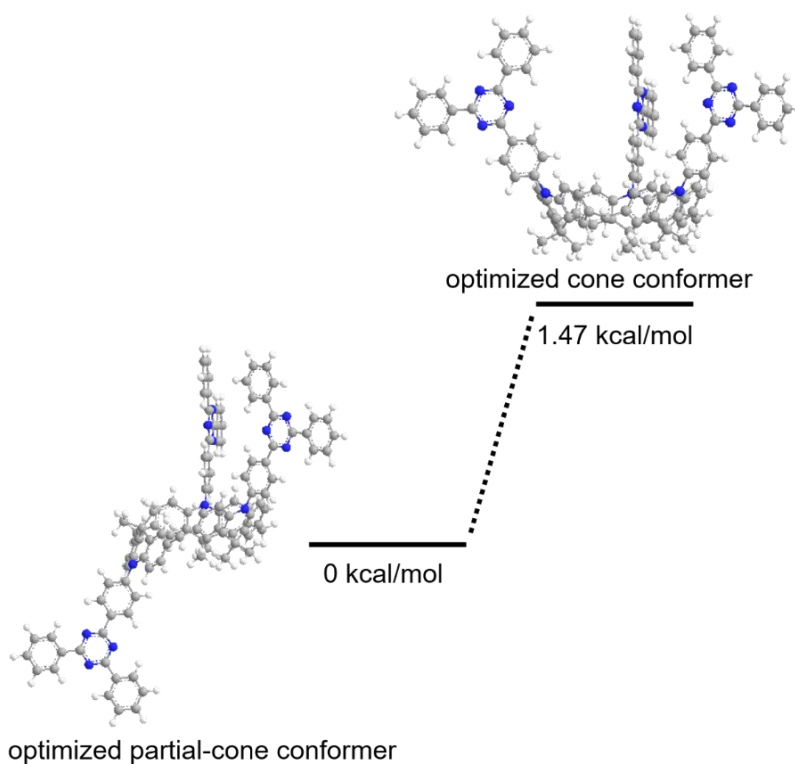

**Fig. S10** Optimized structures and energy diagram of cone and partial-cone conformers of TC[3]A.

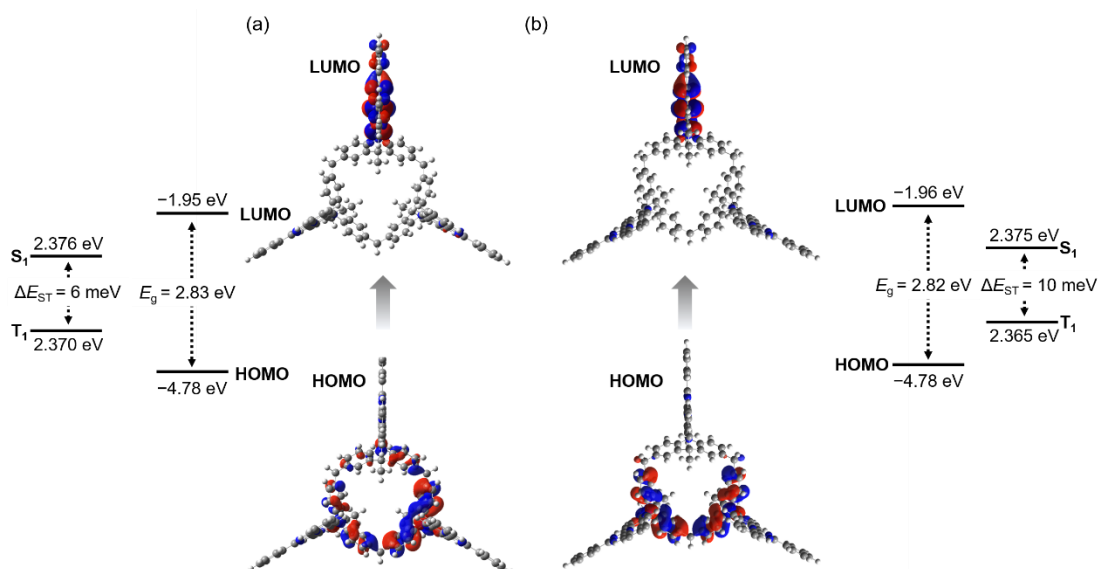

**Fig. S11** Calculated energy levels of TC[3]A: (a) cone conformer; (b) partial-cone conformer.

Cartesian coordinates of optimized TC[3]A with the cone conformation:

|   |             |             |             |
|---|-------------|-------------|-------------|
| N | -0.95662500 | 5.26767700  | -2.82673900 |
| N | -1.41007000 | 7.77584700  | 3.11775200  |
| N | -1.76633200 | 9.71024900  | 1.79212600  |
| N | -1.79272500 | 9.87230600  | 4.15769000  |
| C | -1.95787200 | 3.84032200  | -4.52850300 |
| C | -4.17128200 | 2.84131900  | -4.15783800 |
| C | -3.01177200 | 3.01327300  | -4.92300300 |
| H | -2.94272400 | 2.48752300  | -5.86978000 |
| C | -2.05484200 | 4.49806700  | -3.28246900 |
| C | -1.09656000 | 6.03826700  | -1.62402300 |
| C | -1.89284500 | 10.40872700 | 2.93174300  |
| C | 0.34182500  | 4.93169800  | -3.28235800 |
| C | -1.52579300 | 8.39876000  | 1.93572900  |
| C | -0.75408800 | 4.14974400  | -5.42485400 |
| C | 1.48539200  | 5.22463400  | -2.52473700 |
| H | 1.39331400  | 5.75288800  | -1.58330900 |
| C | 4.26654400  | 3.60926000  | -4.60380800 |
| H | 5.04768200  | 4.27114800  | -4.21034400 |
| H | 4.33281600  | 3.66418500  | -5.69796100 |
| C | -1.37761700 | 7.58253400  | 0.70510300  |
| C | -4.26904200 | 3.55711300  | -2.96334300 |
| H | -5.16354500 | 3.47045700  | -2.35047400 |
| C | -1.34727900 | 7.41048600  | -1.71462300 |
| H | -1.43125900 | 7.86703000  | -2.69606700 |
| C | -1.55079500 | 8.55335300  | 4.20329700  |

|   |             |             |             |
|---|-------------|-------------|-------------|
| C | 0.48166600  | 4.28159300  | -4.52834400 |
| C | 2.90467100  | 4.12098500  | -4.15733000 |
| C | -3.22837300 | 4.37155300  | -2.52470700 |
| H | -3.32689200 | 4.89804900  | -1.58293100 |
| C | -1.48685200 | 8.17712000  | -0.56070800 |
| H | -1.68135800 | 9.24131500  | -0.62584200 |
| C | -0.56391500 | 3.09871100  | -6.53190200 |
| H | -0.38369500 | 2.09954300  | -6.12075300 |
| H | 0.27806500  | 3.36450200  | -7.17785200 |
| H | -1.44519800 | 3.05358800  | -7.17852700 |
| C | 2.74541100  | 4.82620200  | -2.96314100 |
| H | 3.61355500  | 5.05900500  | -2.35045300 |
| C | 1.75851700  | 3.87591000  | -4.92262800 |
| H | 1.87815600  | 3.35945600  | -5.86945800 |
| C | -1.12599600 | 6.20388700  | 0.79151800  |
| H | -1.04200200 | 5.74618700  | 1.77038700  |
| C | -2.16025900 | 11.86348300 | 2.82913500  |
| C | -0.98698200 | 5.43858500  | -0.36195800 |
| H | -0.79262200 | 4.37223900  | -0.29614100 |
| C | -1.00309000 | 5.52609900  | -6.11084600 |
| H | -1.89996400 | 5.48021900  | -6.73978000 |
| H | -0.14674400 | 5.79788200  | -6.73920000 |
| H | -1.14683600 | 6.31851500  | -5.37044700 |
| C | -1.43145500 | 7.91404300  | 5.53589400  |
| C | -1.17883200 | 6.53728500  | 5.64336500  |
| H | -1.07305700 | 5.95179300  | 4.73732100  |
| C | -1.56953000 | 8.67859800  | 6.70520000  |
| H | -1.76442400 | 9.74112800  | 6.61604900  |
| C | -1.06697200 | 5.93890300  | 6.89579800  |
| H | -0.87134800 | 4.87249900  | 6.96839400  |
| C | -1.45704700 | 8.07677500  | 7.95590400  |
| H | -1.56555000 | 8.67716500  | 8.85507000  |
| C | -1.20558800 | 6.70607900  | 8.05515200  |
| H | -1.11802600 | 6.23772100  | 9.03200700  |
| C | -2.27459500 | 12.47795300 | 1.57205400  |
| H | -2.16417000 | 11.87153200 | 0.68045200  |
| C | -2.30219100 | 12.64284100 | 3.98818100  |
| H | -2.21288500 | 12.16301200 | 4.95600900  |
| C | -2.52581200 | 13.84439200 | 1.47788100  |
| H | -2.61259100 | 14.31068400 | 0.50025800  |
| C | -2.66592400 | 14.61364300 | 2.63567700  |
| H | -2.86200000 | 15.68002500 | 2.56064800  |
| C | -2.55342100 | 14.00898400 | 3.89013200  |
| H | -2.66174900 | 14.60365100 | 4.79311200  |

|   |             |             |             |
|---|-------------|-------------|-------------|
| N | -4.09112900 | -3.46512100 | -2.81994600 |
| N | -6.03649500 | -5.10919000 | 3.12558200  |
| N | -7.54525900 | -6.37120800 | 1.80005000  |
| N | -7.66816500 | -6.48005100 | 4.16558000  |
| C | -2.35289500 | -3.62097700 | -4.52027900 |
| C | -0.38188500 | -5.03883600 | -4.14647800 |
| C | -1.10947000 | -4.12091400 | -4.91299500 |
| H | -0.68762800 | -3.79927100 | -5.85961400 |
| C | -2.87553000 | -4.03267000 | -3.27442000 |
| C | -4.68969500 | -3.96924200 | -1.61690400 |
| C | -8.08791100 | -6.82881000 | 2.93965900  |
| C | -4.44879400 | -2.17330500 | -3.27735200 |
| C | -6.52346800 | -5.51457000 | 1.94358600  |
| C | -3.22119100 | -2.73327700 | -5.41829100 |
| C | -5.27413000 | -1.32847200 | -2.52066700 |
| H | -5.68511300 | -1.67098400 | -1.57852400 |
| C | -5.26726300 | 1.88461400  | -4.60429800 |
| H | -6.23078400 | 2.23023900  | -4.21028000 |
| H | -5.34909300 | 1.91317100  | -5.69842000 |
| C | -5.88937700 | -4.98005300 | 0.71280600  |
| C | -0.95439900 | -5.48048700 | -2.95239800 |
| H | -0.43332200 | -6.21191800 | -2.33859800 |
| C | -5.75597300 | -4.86867000 | -1.70694300 |
| H | -6.11079400 | -5.16858900 | -2.68820500 |
| C | -6.64048900 | -5.61860800 | 4.21112100  |
| C | -3.95485300 | -1.72847800 | -4.52346600 |
| C | -5.02871400 | 0.45012700  | -4.15590400 |
| C | -2.18027000 | -4.98555100 | -2.51537800 |
| H | -2.58796000 | -5.33340500 | -1.57378400 |
| C | -6.35163900 | -5.37035500 | -0.55276200 |
| H | -7.17853600 | -6.06794400 | -0.61753600 |
| C | -2.40407400 | -2.04327600 | -6.52413100 |
| H | -1.63002200 | -1.38711800 | -6.11163700 |
| H | -3.05414700 | -1.44762200 | -7.17172400 |
| H | -1.92263200 | -2.78380900 | -7.16957900 |
| C | -5.55949800 | -0.03877400 | -2.96093900 |
| H | -6.19498200 | 0.59759700  | -2.34903400 |
| C | -4.24246000 | -0.42049800 | -4.91962900 |
| H | -3.85451100 | -0.05961500 | -5.86662400 |
| C | -4.81810900 | -4.07641800 | 0.79865900  |
| H | -4.46232600 | -3.77582700 | 1.77732600  |
| C | -9.22145600 | -7.77904800 | 2.83705800  |
| C | -4.22374200 | -3.57536100 | -0.35513900 |
| H | -3.39529700 | -2.87634800 | -0.28980300 |

|   |              |              |             |
|---|--------------|--------------|-------------|
| C | -4.28760300  | -3.63725200  | -6.10564500 |
| H | -3.79856400  | -4.39220500  | -6.73248100 |
| H | -4.94930000  | -3.03182700  | -6.73623900 |
| H | -4.90401500  | -4.15659900  | -5.36597500 |
| C | -6.14054800  | -5.20246600  | 5.54361800  |
| C | -5.06762200  | -4.30350300  | 5.65079600  |
| H | -4.61263500  | -3.92038200  | 4.74464000  |
| C | -6.73461600  | -5.70278200  | 6.71307500  |
| H | -7.56267100  | -6.39654900  | 6.62415000  |
| C | -4.59951800  | -3.91390900  | 6.90309300  |
| H | -3.76843300  | -3.21761900  | 6.97545300  |
| C | -6.26384800  | -5.31091800  | 7.96365700  |
| H | -6.73035600  | -5.70383400  | 8.86294900  |
| C | -5.19562700  | -4.41592700  | 8.06260600  |
| H | -4.82921400  | -4.11099000  | 9.03935000  |
| C | -9.70342200  | -8.17705400  | 1.57998600  |
| H | -9.23325400  | -7.77842600  | 0.68839600  |
| C | -9.82568000  | -8.29131600  | 3.99610300  |
| H | -9.44936300  | -7.98045700  | 4.96391400  |
| C | -10.76834800 | -9.06936300  | 1.48585100  |
| H | -11.13422000 | -9.37126200  | 0.50825000  |
| C | -11.36471600 | -9.57501500  | 2.64365800  |
| H | -12.19577600 | -10.27140700 | 2.56866200  |
| C | -10.89033800 | -9.18348400  | 3.89809100  |
| H | -11.35130500 | -9.57445200  | 4.80108000  |
| N | 5.04033100   | -1.81295000  | -2.81818000 |
| N | 7.45605300   | -2.66664500  | 3.12095600  |
| N | 9.30635100   | -3.32383900  | 1.79033600  |
| N | 9.46787500   | -3.37742800  | 4.15549400  |
| C | 4.30580900   | -0.23465800  | -4.52275800 |
| C | 4.54658300   | 2.18230500   | -4.15515500 |
| C | 4.11668300   | 1.09103700   | -4.91923700 |
| H | 3.62789000   | 1.29283100   | -5.86680800 |
| C | 4.92308200   | -0.47773900  | -3.27592900 |
| C | 5.78036500   | -2.07630100  | -1.61711400 |
| C | 9.97880500   | -3.56003200  | 2.92814400  |
| C | 4.10032000   | -2.77009800  | -3.27244700 |
| C | 8.05000100   | -2.87837600  | 1.93730500  |
| C | 3.97232000   | -1.43333300  | -5.41738500 |
| C | 3.78093600   | -3.90500500  | -2.51242600 |
| H | 4.28297400   | -4.08700400  | -1.56972000 |
| C | 0.99458300   | -5.51075300  | -4.59196300 |
| H | 1.17673200   | -6.51715100  | -4.19569000 |
| H | 1.01069700   | -5.59836400  | -5.68589500 |

|   |             |             |             |
|---|-------------|-------------|-------------|
| C | 7.26494100  | -2.60161200 | 0.70860500  |
| C | 5.21425100  | 1.91083400  | -2.95968100 |
| H | 5.58575200  | 2.72970700  | -2.34757100 |
| C | 7.09428000  | -2.54436700 | -1.71067400 |
| H | 7.52915400  | -2.70036600 | -2.69315400 |
| C | 8.20382000  | -2.93024500 | 4.20449800  |
| C | 3.46847800  | -2.56832300 | -4.51930500 |
| C | 2.11803700  | -4.58618700 | -4.14591100 |
| C | 5.39914900  | 0.60303200  | -2.51912400 |
| H | 5.90354400  | 0.42654600  | -1.57662400 |
| C | 7.83130800  | -2.80503800 | -0.55851700 |
| H | 8.85040000  | -3.16764300 | -0.62602400 |
| C | 2.96705600  | -1.07441400 | -6.52523800 |
| H | 2.01102400  | -0.73186500 | -6.11473000 |
| H | 2.77774500  | -1.93710400 | -7.17078100 |
| H | 3.36780900  | -0.28855100 | -7.17225400 |
| C | 2.80637400  | -4.79793500 | -2.95005600 |
| H | 2.57245800  | -5.66443200 | -2.33547700 |
| C | 2.47956800  | -3.47247900 | -4.91303200 |
| H | 1.97337300  | -3.31981400 | -5.86067700 |
| C | 5.94482000  | -2.13180400 | 0.79803300  |
| H | 5.50891900  | -1.97505300 | 1.77789900  |
| C | 11.37312500 | -4.05288400 | 2.82168500  |
| C | 5.20919300  | -1.87133900 | -0.35375100 |
| H | 4.18837800  | -1.50737500 | -0.28541600 |
| C | 5.28888200  | -1.90679100 | -6.10237400 |
| H | 5.69811400  | -1.10790300 | -6.73193100 |
| H | 5.09609300  | -2.78491200 | -6.72987700 |
| H | 6.04654500  | -2.17789400 | -5.36128400 |
| C | 7.59422300  | -2.71363500 | 5.53873800  |
| C | 6.27463300  | -2.24760500 | 5.64973900  |
| H | 5.71125100  | -2.04933800 | 4.74519900  |
| C | 8.32983500  | -2.97260500 | 6.70606900  |
| H | 9.34823600  | -3.33221900 | 6.61419300  |
| C | 5.70382500  | -2.04527200 | 6.90369100  |
| H | 4.68168500  | -1.68428500 | 6.97901400  |
| C | 7.75573800  | -2.76908300 | 7.95831500  |
| H | 8.33335800  | -2.97244000 | 8.85594600  |
| C | 6.44191500  | -2.30516800 | 8.06107000  |
| H | 5.99515700  | -2.14678100 | 9.03912600  |
| C | 11.95821500 | -4.26329600 | 1.56298800  |
| H | 11.37393000 | -4.05983000 | 0.67298100  |
| C | 12.12406500 | -4.31443500 | 3.97865800  |
| H | 11.66712800 | -4.15016400 | 4.94774100  |

|   |             |             |            |
|---|-------------|-------------|------------|
| C | 13.26801600 | -4.72591700 | 1.46522800 |
| H | 13.71191000 | -4.88567100 | 0.48637800 |
| C | 14.00930400 | -4.98395300 | 2.62098600 |
| H | 15.03149400 | -5.34494300 | 2.54314000 |
| C | 13.43359300 | -4.77691600 | 3.87702100 |
| H | 14.00667000 | -4.97634300 | 4.77843600 |

Cartesian coordinates of optimized **TC[3]A** with the partial-cone conformation:

|   |             |             |             |
|---|-------------|-------------|-------------|
| N | 5.97184200  | 0.00083200  | -1.80701300 |
| N | 11.97287700 | -0.00036400 | 0.60437500  |
| N | -6.87630800 | 8.46410500  | 0.42093600  |
| N | 12.43102700 | 0.00003300  | -1.72292800 |
| N | -1.85255000 | 4.59358800  | 1.64788200  |
| N | -8.78373400 | 8.55741700  | -0.98475700 |
| N | -1.85235500 | -4.59325700 | 1.64709100  |
| N | 14.21665800 | -0.00052100 | -0.16262000 |
| N | -7.31120300 | 6.70275700  | -1.10701700 |
| C | 7.37579500  | 0.00062800  | -1.50895500 |
| C | 5.25771900  | -1.21951900 | -1.75330800 |
| C | 5.25790800  | 1.22126400  | -1.75269000 |
| C | 3.90586000  | 1.24678900  | -2.16610700 |
| C | 3.78111600  | -3.62253700 | -1.55937800 |
| C | 3.19774700  | -2.44070000 | -2.03716900 |
| H | 2.15233400  | -2.47258600 | -2.32501900 |
| C | 3.90566700  | -1.24462700 | -2.16674700 |
| C | 0.53745300  | -4.17810700 | 1.40322700  |
| C | 1.68319600  | -4.23148500 | 0.60794300  |
| H | 2.60670400  | -3.79908400 | 0.97713800  |
| C | 3.19812400  | 2.44290400  | -2.03591300 |
| H | 2.15271100  | 2.47509700  | -2.32372800 |
| N | -6.87521800 | -8.46514700 | 0.42078800  |
| C | 10.13150300 | 0.00018200  | -0.96670700 |
| C | 1.70070900  | -4.83121500 | -0.65819500 |
| C | -0.79287000 | -2.94885200 | 3.09899500  |
| C | 5.86154600  | -2.39783800 | -1.29281300 |
| H | 6.90162700  | -2.39388700 | -0.98981500 |
| N | -7.31144000 | -6.70332800 | -1.10624200 |
| C | -7.98965000 | 9.06449000  | -0.02923800 |
| C | 0.53745600  | 4.17914700  | 1.40478100  |
| N | -8.78324400 | -8.55857100 | -0.98408300 |
| C | 11.58786300 | -0.00006800 | -0.68019300 |
| C | 8.29993400  | 0.00068400  | -2.55775800 |
| H | 7.93614000  | 0.00090600  | -3.58067700 |
| C | 0.51256600  | -5.39707000 | -1.12250300 |

|   |              |             |             |
|---|--------------|-------------|-------------|
| H | 0.48830700   | -5.88223300 | -2.09604100 |
| C | 0.54279300   | -3.65571900 | 2.84414900  |
| C | -1.96827000  | -3.51567100 | 2.55863700  |
| C | 5.12944200   | -3.57981000 | -1.20425900 |
| H | 5.62257900   | -4.47928700 | -0.84189300 |
| C | -0.79308300  | 2.94931700  | 3.09995100  |
| C | -8.36490400  | 10.36927400 | 0.56664700  |
| C | 1.70122000   | 4.83282000  | -0.65617800 |
| C | 3.78168200   | 3.62440900  | -1.55753600 |
| C | 3.32056200   | 0.00130100  | -2.84295700 |
| C | -0.66352400  | 4.71629700  | 0.88834000  |
| C | -9.51674000  | 11.04364400 | 0.13142900  |
| H | -10.12445000 | 10.59433600 | -0.64557200 |
| C | -0.91820400  | -1.82522600 | 3.91897100  |
| H | -0.02213400  | -1.36571600 | 4.32325900  |
| C | -0.66354700  | -4.71555000 | 0.88715500  |
| C | 9.66636000   | 0.00046300  | -2.29008500 |
| H | 10.38682900  | 0.00051000  | -3.09973400 |
| C | 1.68344800   | 4.23294100  | 0.60989500  |
| H | 2.60696300   | 3.80076800  | 0.97934500  |
| C | 5.86192800   | 2.39926200  | -1.29162400 |
| H | 6.90201700   | 2.39499500  | -0.98865300 |
| C | 7.83466300   | 0.00035600  | -0.18482200 |
| H | 7.11323000   | 0.00031600  | 0.62684800  |
| C | 13.29884700  | -0.00059900 | 0.81612300  |
| C | 2.98223400   | -4.91184300 | -1.47344600 |
| H | 2.72507600   | -5.25472300 | -2.48551800 |
| H | 3.63357700   | -5.69307000 | -1.05617000 |
| C | 0.54244500   | 3.65662800  | 2.84565700  |
| C | -1.96846400  | 3.51578000  | 2.55918900  |
| C | -0.65686100  | -5.34080800 | -0.36758300 |
| H | -1.56845600  | -5.76863800 | -0.76735400 |
| C | 9.19975900   | 0.00013500  | 0.08362300  |
| H | 9.56101600   | -0.00007900 | 1.10549900  |
| C | 5.13000900   | 3.58130200  | -1.20246400 |
| H | 5.62329100   | 4.48052400  | -0.83966300 |
| C | -0.65659200  | 5.34170000  | -0.36631400 |
| H | -1.56817400  | 5.76930900  | -0.76635000 |
| C | -0.91835700  | 1.82555900  | 3.91976200  |
| H | -0.02229500  | 1.36634700  | 4.32441300  |
| C | 0.51308500   | 5.39838900  | -1.12083000 |
| H | 0.48902100   | 5.88367000  | -2.09431400 |
| C | 13.73828100  | -0.00018800 | -1.41631700 |
| C | -6.57827800  | 7.28665300  | -0.14760000 |



|   |              |             |             |
|---|--------------|-------------|-------------|
| C | -8.40657500  | 7.37527100  | -1.49520000 |
| C | -2.15566500  | -1.26708200 | 4.26019300  |
| C | -3.39823200  | 6.48618400  | 1.74459500  |
| H | -2.76829900  | 6.91869000  | 2.51584400  |
| C | -2.15575700  | 1.26690600  | 4.26037200  |
| C | -5.35593600  | 6.58345100  | 0.31505200  |
| C | -4.54537200  | 7.14622800  | 1.31202000  |
| H | -4.82613400  | 8.10170100  | 1.73962900  |
| C | -9.86774600  | 12.26904200 | 0.69202600  |
| H | -10.76113400 | 12.78330500 | 0.34830900  |
| C | -2.23684600  | -0.00014900 | 5.09892600  |
| H | -1.42500000  | -0.00016200 | 5.83732600  |
| H | -3.17587000  | -0.00023400 | 5.66584600  |
| C | -9.25198500  | 6.77379400  | -2.55450600 |
| C | 2.98300400   | 4.91380900  | -1.47097300 |
| H | 2.72621900   | 5.25742000  | -2.48289000 |
| H | 3.63435700   | 5.69463000  | -1.05295900 |
| C | 14.71385400  | -0.00006800 | -2.53278400 |
| C | -7.57282000  | 10.94504200 | 1.57262200  |
| H | -6.68460700  | 10.42011900 | 1.90496900  |
| C | -3.04137200  | 5.25390900  | 1.18938100  |
| C | 13.77836900  | -0.00096800 | 2.21912900  |
| C | -3.30402700  | 1.89300100  | 3.77234500  |
| H | -4.28630300  | 1.50630400  | 4.03473500  |
| C | -3.21832300  | 2.99859300  | 2.93055900  |
| H | -4.12786900  | 3.44914900  | 2.55167900  |
| C | -3.04114000  | -5.25384400 | 1.18887400  |
| C | -3.21816600  | -2.99902000 | 2.93065100  |
| H | -4.12770600  | -3.44988700 | 2.55212900  |
| C | -3.30391300  | -1.89357700 | 3.77262800  |
| H | -4.28621900  | -1.50731600 | 4.03555200  |
| C | 1.78165100   | 0.00142400  | -2.83237800 |
| H | 1.37995900   | 0.00116700  | -1.81368700 |
| H | 1.38962500   | -0.87357400 | -3.35852600 |
| H | 1.38976700   | 0.87678700  | -3.35802400 |
| C | 3.79122200   | 0.00165200  | -4.32830900 |
| H | 3.41633600   | 0.89276400  | -4.84532700 |
| H | 3.41621300   | -0.88914100 | -4.84578700 |
| H | 4.88326100   | 0.00159500  | -4.39861000 |
| C | -5.35559500  | -6.58388000 | 0.31501900  |
| C | 1.75015900   | -2.74674500 | 3.13145400  |
| H | 2.68819900   | -3.28764000 | 2.97714000  |
| H | 1.74994700   | -2.42170400 | 4.17608900  |
| H | 1.75492000   | -1.85827200 | 2.49108700  |

|   |              |              |             |
|---|--------------|--------------|-------------|
| C | -7.92705300  | 12.17053500  | 2.13104000  |
| H | -7.30749500  | 12.60787800  | 2.90924200  |
| C | -6.57787400  | -7.28735200  | -0.14739100 |
| C | -9.07469700  | 12.83594100  | 1.69284400  |
| H | -9.34991900  | 13.79239900  | 2.12953300  |
| C | 12.86243800  | -0.00105700  | 3.28305500  |
| H | 11.80148200  | -0.00085000  | 3.06105100  |
| C | 15.15401100  | -0.00123900  | 2.49938800  |
| H | 15.85659400  | -0.00117200  | 1.67397800  |
| C | -3.39740000  | -6.48638700  | 1.74387800  |
| H | -2.76704800  | -6.91890700  | 2.51477800  |
| C | 0.62900500   | -4.88234500  | 3.80068900  |
| H | -0.20719400  | -5.56966600  | 3.64152700  |
| H | 0.60438700   | -4.55158700  | 4.84566600  |
| H | 1.56111000   | -5.43317400  | 3.62828800  |
| C | 16.09305200  | -0.00008900  | -2.27054300 |
| H | 16.43027500  | -0.00019800  | -1.24039500 |
| C | -4.99419200  | -5.34570000  | -0.23972100 |
| H | -5.62174700  | -4.91258400  | -1.01000700 |
| C | -3.84767700  | -4.68685700  | 0.19266700  |
| H | -3.56711100  | -3.72953100  | -0.23632400 |
| C | -4.99392800  | 5.34554700   | -0.23990800 |
| H | -5.62106800  | 4.91244300   | -1.01053900 |
| C | -4.54448500  | -7.14667700  | 1.31153300  |
| H | -4.82478900  | -8.10235800  | 1.73897900  |
| C | -3.84736200  | 4.68694700   | 0.19271600  |
| H | -3.56633800  | 3.72983200   | -0.23644600 |
| C | -8.36302800  | -10.37094200 | 0.56634500  |
| C | -7.98853800  | -9.06575700  | -0.02914200 |
| C | -8.40674600  | -7.37607400  | -1.49420300 |
| C | -10.84996700 | 5.63753900   | -4.55755300 |
| H | -11.46957300 | 5.19700700   | -5.33427100 |
| C | 14.26961000  | 0.00007100   | -3.86452800 |
| H | 13.20369200  | 0.00008700   | -4.06131200 |
| C | 1.74999800   | 2.74800500   | 3.13329400  |
| H | 1.75524800   | 1.85958600   | 2.49285300  |
| H | 1.74954200   | 2.42288000   | 4.17790000  |
| H | 2.68791800   | 3.28921000   | 2.97934000  |
| C | 15.60271700  | -0.00158900  | 3.81762200  |
| H | 16.66950900  | -0.00180000  | 4.02424500  |
| C | -10.40887700 | 7.43296400   | -2.99945100 |
| H | -10.67188000 | 8.38626000   | -2.55562400 |
| C | 13.31481400  | -0.00140700  | 4.60005100  |
| H | 12.59790800  | -0.00147400  | 5.41661400  |

|   |              |              |             |
|---|--------------|--------------|-------------|
| C | 0.62794000   | 4.88320000   | 3.80234000  |
| H | 1.55993200   | 5.43433200   | 3.63031400  |
| H | 0.60305800   | 4.55233200   | 4.84727500  |
| H | -0.20842000  | 5.57026600   | 3.64294400  |
| C | -9.25286000  | -6.77446300  | -2.55287200 |
| C | 14.68531800  | -0.00167400  | 4.87133300  |
| H | 15.03697800  | -0.00194500  | 5.89972200  |
| C | 17.00802600  | 0.00003400   | -3.32024500 |
| H | 18.07352000  | 0.00002400   | -3.10702200 |
| C | -10.40948800 | -7.43406600  | -2.99785800 |
| H | -10.67176600 | -8.38779900  | -2.55454000 |
| C | -7.57004000  | -10.94705300 | 1.57141000  |
| H | -6.68169600  | -10.42209600 | 1.90335300  |
| C | -8.90503000  | 5.53874400   | -3.12467800 |
| H | -8.01075300  | 5.03416800   | -2.77742100 |
| C | -11.20152900 | 6.86695600   | -3.99466400 |
| H | -12.09505400 | 7.38499000   | -4.33230600 |
| C | -9.51503700  | -11.04535700 | 0.13165100  |
| H | -10.12345000 | -10.59578000 | -0.64464600 |
| C | -9.70010800  | 4.97575800   | -4.11969400 |
| H | -9.42298700  | 4.01938700   | -4.55479400 |
| C | -8.90684100  | -5.53884900  | -3.12239100 |
| H | -8.01276200  | -5.03394000  | -2.77510900 |
| C | 15.18753700  | 0.00018400   | -4.91168700 |
| H | 14.83373100  | 0.00028400   | -5.93908000 |
| C | -11.20279900 | -6.86793100  | -3.99247400 |
| H | -12.09610300 | -7.38631300  | -4.33016600 |
| C | -9.86532700  | -12.27113000 | 0.69187400  |
| H | -10.75885800 | -12.78542100 | 0.34857300  |
| C | 16.55857100  | 0.00016800   | -4.64309000 |
| H | 17.27387200  | 0.00026200   | -5.46138100 |
| C | -7.92355000  | -12.17292900 | 2.12944600  |
| H | -7.30328700  | -12.61054100 | 2.90693400  |
| C | -9.07137500  | -12.83837200 | 1.69178100  |
| H | -9.34604000  | -13.79512300 | 2.12817900  |
| C | -10.85217400 | -5.63794800  | -4.55470700 |
| H | -11.47229800 | -5.19731400  | -5.33095600 |
| C | -9.70258500  | -4.97573000  | -4.11679900 |
| H | -9.42619800  | -4.01891100  | -4.55138300 |

## 5. Photophysical measurements

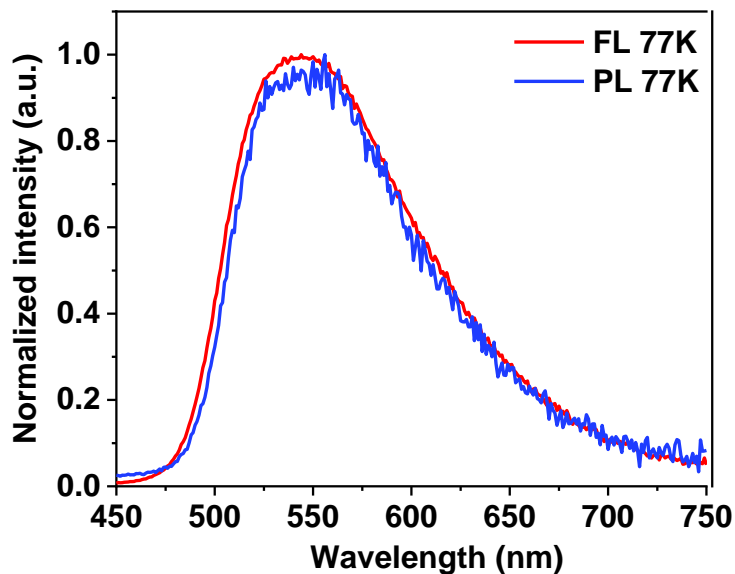

Fig. S12 Fluorescence and phosphorescence spectra of TC[3]A in neat films at 77K.

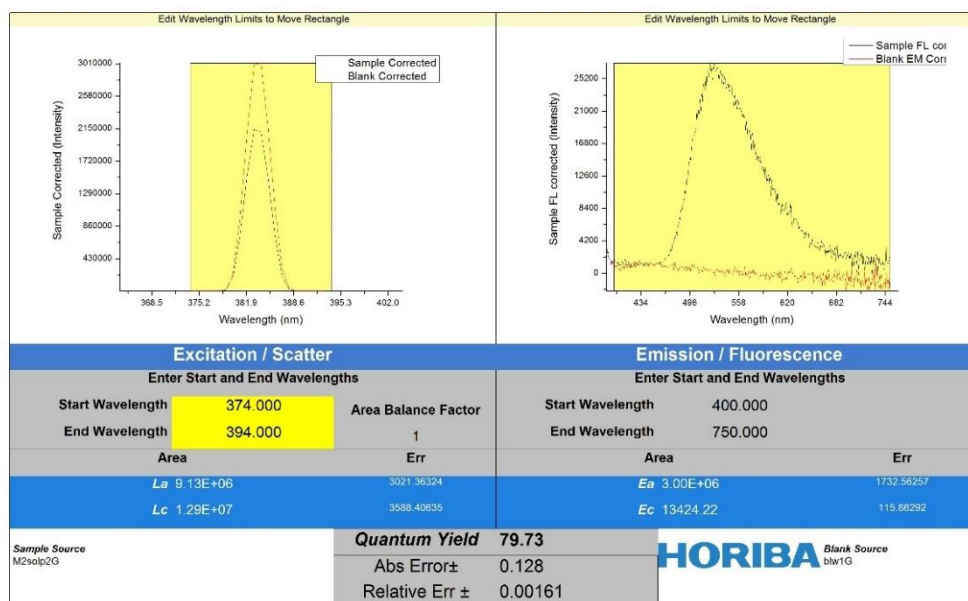

Fig. S13 PLQY of TC[3]A in diluted toluene (measured after nitrogen purging).

## 6. Reference

- S1 W. L. Tsai, M. H. Huang, W. K. Lee, Y. J. Hsu, K. C. Pan, Y. H. Huang, H. C. Ting, M. Sarma, Y. Y. Ho, H. C. Hu, C. C. Chen, M. T. Lee, K. T. Wong and C. C. Wu, *Chem. Commun.*, 2015, **51**, 13662-13665.
